# Supplementary material for: A method for constructing directional surface wave spectra from ICESat-2 altimetry
Source: Copernicus journal article supplement (doi:10.5194/tc-18-341-2024), 2024-01-19
Supplement: Supplementary file 1 [file tc-18-341-2024-supplement.pdf]

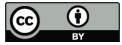

*Supplement of*

## **A method for constructing directional surface wave spectra from ICESat-2 altimetry**

**Momme C. Hell and Christopher Horvat**

*Correspondence to:* Momme C. Hell ([mhell@ucar.edu](mailto:mhell@ucar.edu))

The copyright of individual parts of the supplement might differ from the article licence.

## S1 Power spectral slope estimate $\hat{\hat{\mathbf{S}}}_{GFT}$ from $\hat{\mathbf{p}}$

The estimated parameter matrix

$$\hat{\mathbf{p}} = [\hat{a}_1, \hat{a}_2, \dots, \hat{a}_M, \hat{c}_1, \dots, \hat{c}_M]^T = (\hat{\mathbf{a}}^T, \hat{\mathbf{c}}^T) \quad (\text{S1.1})$$

is rewritten as a complex vector

$$\hat{\mathbf{Z}} = \hat{\mathbf{a}} + \hat{\mathbf{b}} j. \quad (\text{S1.2})$$

The power spectra of this vector is than

$$\hat{\hat{\mathbf{S}}} = \frac{N_c}{2N_i} \text{Real}(\hat{\mathbf{Z}} \hat{\mathbf{Z}}^*) \quad (\text{S1.3})$$

with  $N_c = L/dx = 2500$  as the maximum possible observation and  $N_i$  as actual observations per segment.

## Supplementary Tables

| Track   | Internal ID          | ATL03 & ATL07/10                                                                |
|---------|----------------------|---------------------------------------------------------------------------------|
| Track 1 | SH_20190224_08800210 | ATL03_20190224022046_08800210_005_01<br>ATL10-02_20190224012038_08800201_005_01 |
| Track 2 | SH_20190219_08070210 | ATL03_20190219073735_08070210_005_01<br>ATL10-02_20190219063727_08070201_005_01 |
| Track 3 | SH_20190502_05160312 | ATL03_20190502021224_05160312_005_01<br>ATL10-02_20190502005851_05160301_005_01 |
| Track 4 | SH_20190502_05180312 | ATL03_20190502052058_05180312_005_01<br>ATL10-02_20190502040726_05180301_005_01 |

Table S1: Tracks names and conventions used in the main text.

## Supplementary Figures

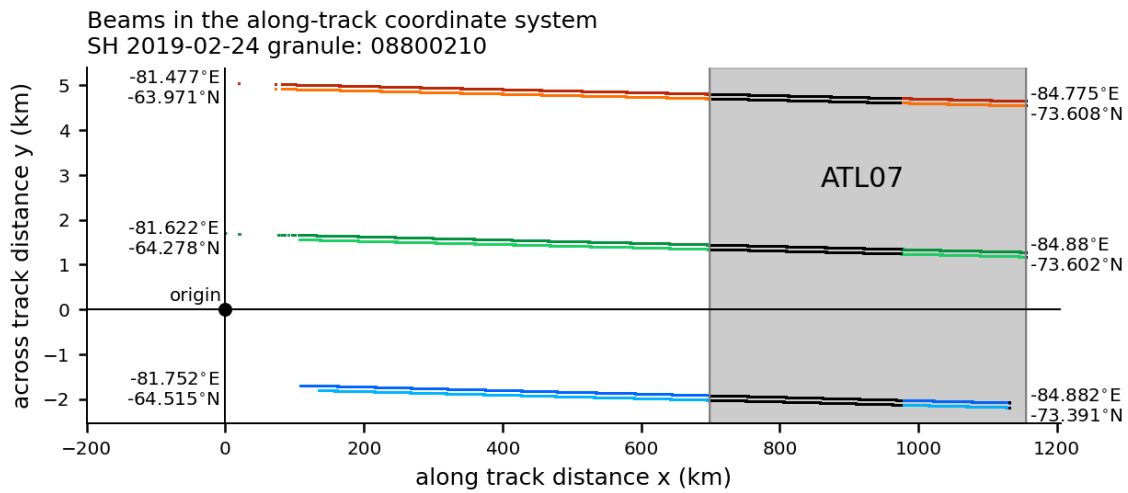

Figure S1: ATL03 Beams with respect to the ground track in the along- and across-track coordinate system for Track 1. The reference point for this analysis is shown as black dot, and the photon position of the six beams referenced to this point are shown in red (gt1l), orange (gt1r), dark green (gt2l), light green (gt2r), dark blue (gt3l), and light blue (gt3r). The ATL07/10 data is available within the gray area and is shown as black lines. The starting and end positions of each beam pair are also shown in latitude-longitude coordinates.

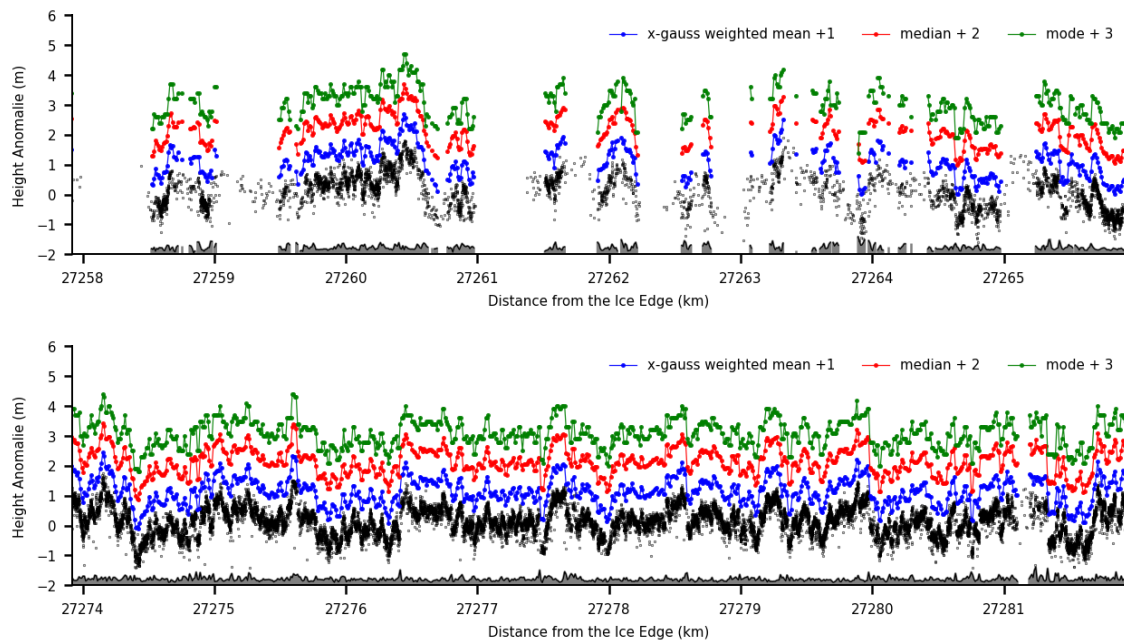

Figure S2: Example photon heights in the MIZ from granule SH 20190208 06440212. The ATL03 data is shown as back dots and three different binning methods offset by 1 meter.

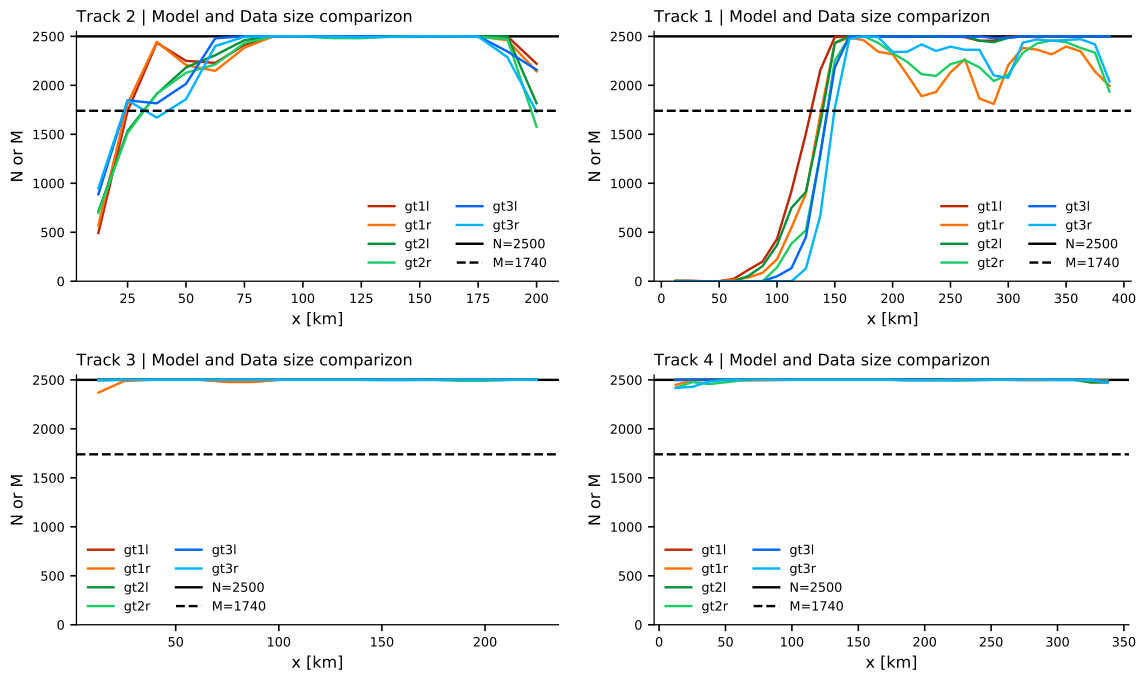

Figure S3: Comparison of model and data size per segment for the four example tracks. The colored lines indicate the individual beams, and the black line is the maximum possible data points  $N$  and the dashed line is the size of the model  $2M$ .

**Generalized Fourier Transform Slope Spectral Power**  
**SH 2019-02-24 granule: 08800210**

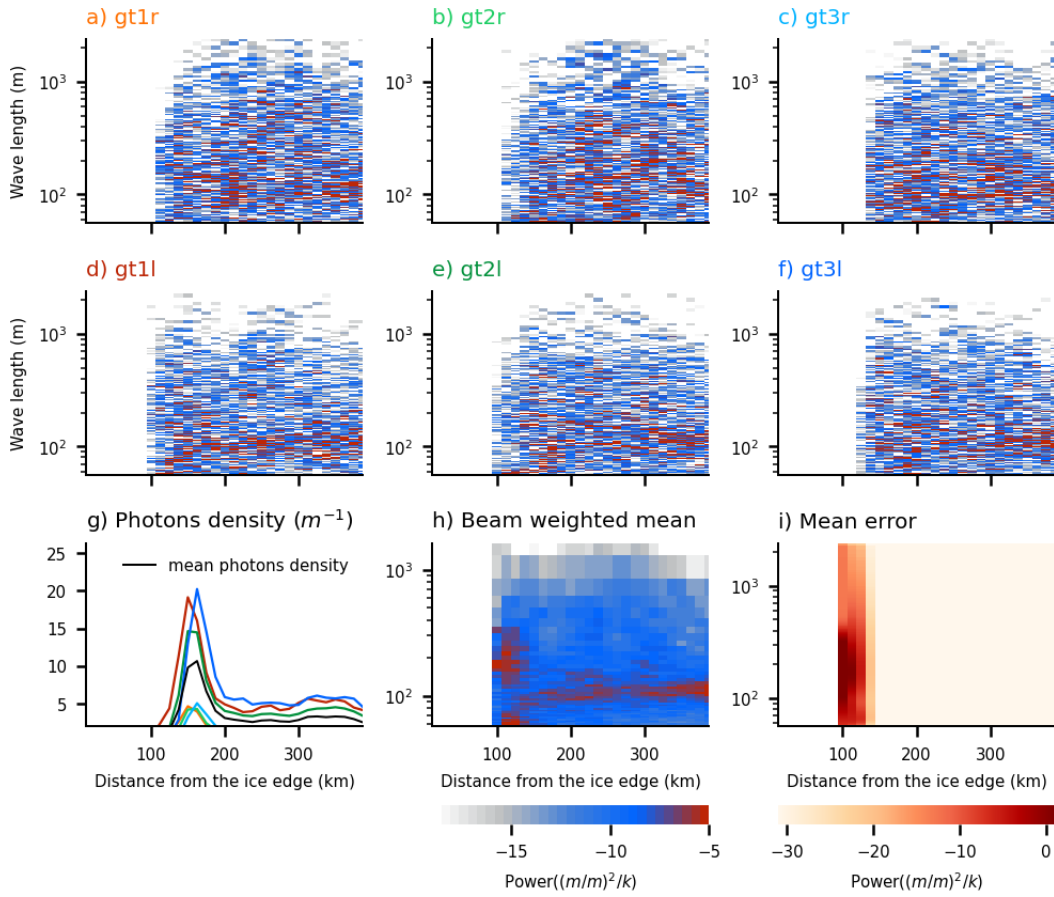

Figure S4: Same as main-text figure 5 but for example Track 1.

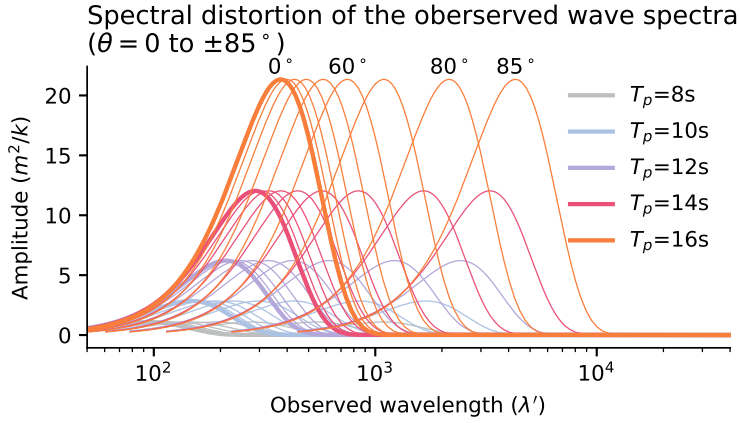

Figure S5: Illustration of the geometric distortion of open ocean spectra depending on the incident angle and peak period.

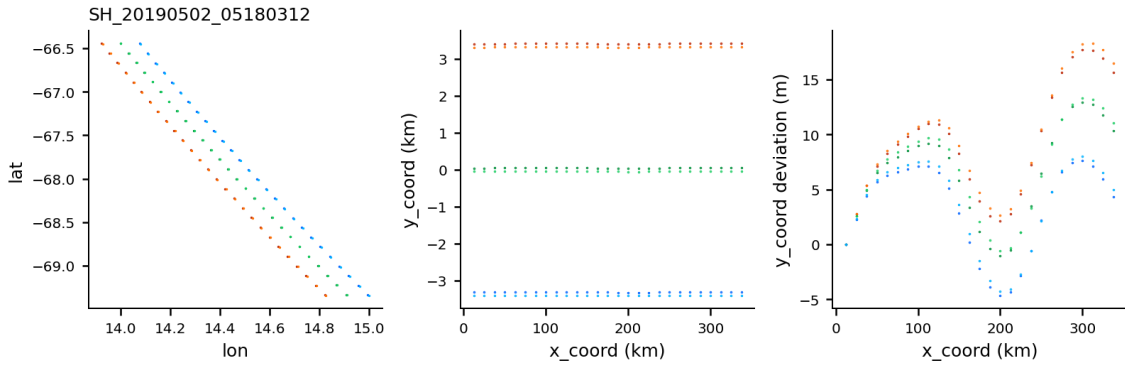

Figure S6: Segment positions of the 6 beams (color coded as in Figure S2) for Track 4 in (a) latitude-longitude coordinates, (b) X-Y-coordinates defined relative to the sea-ice edge on the nominal track position (see Figure S2), and (c) same as (b) but using  $Y' = Y - Y(0)$  for each beam.

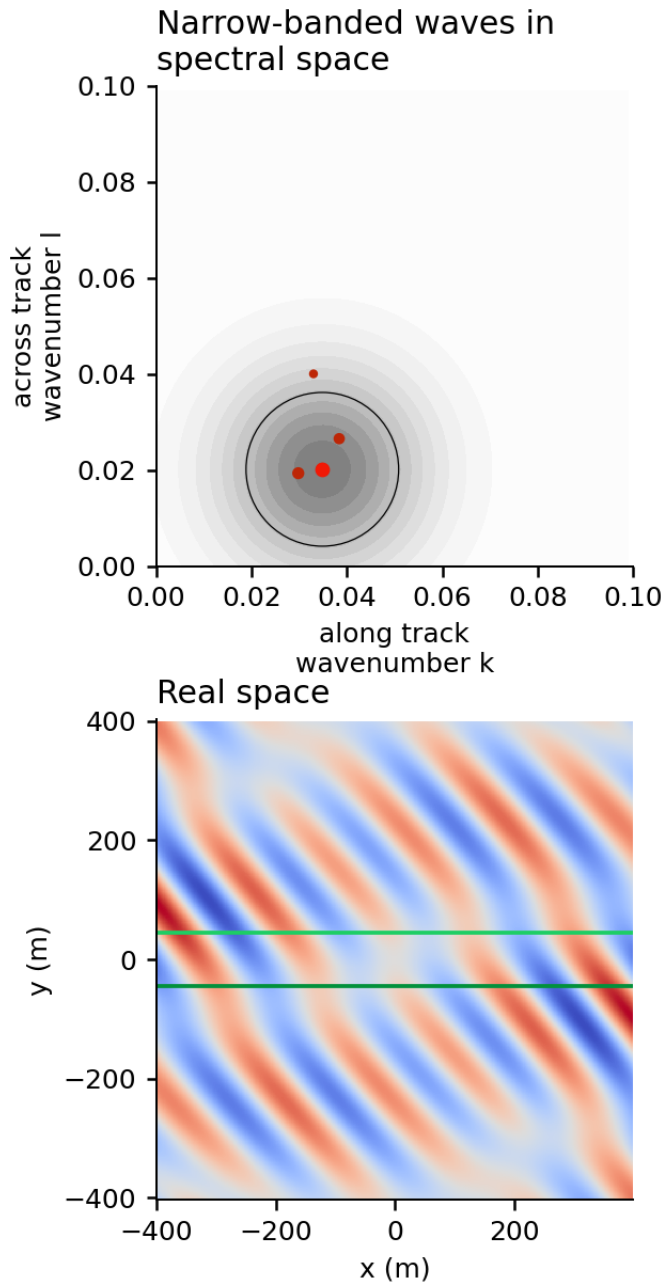

Figure S7: Synthetic narrow-banded wave spectrum. (a) for a given peak direction (thick red dot) and standard deviation (black circle) three additional random wavenumbers were chosen (darker red dots). (b) Realization of the wave field defined by the 4 wavenumbers in (a) with random phase. The green lines illustrate two neighboring ICESat-2 tracks.



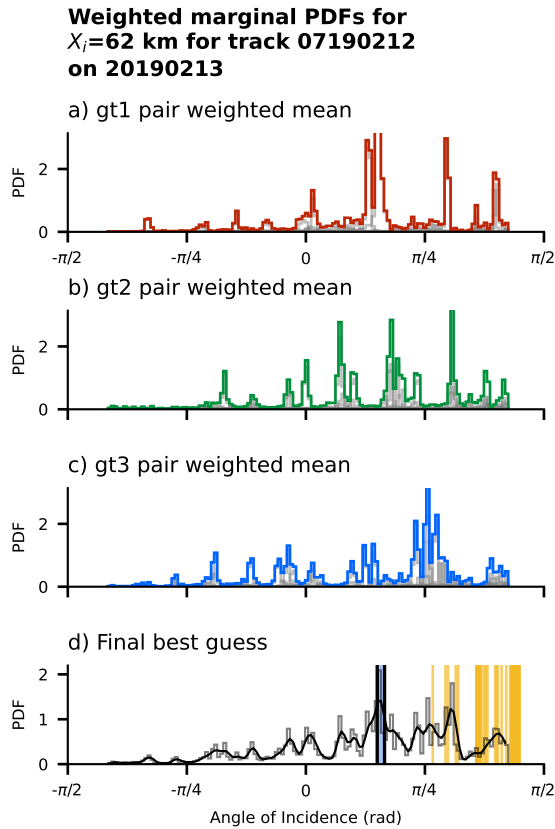

Figure S8: Weighted marginal PDF at  $X_i = 62$  km for the gt1 pair in red (a), gt2 pair in green (b) and gt3 pair in blue (c). Each marginal distribution is weighted by the power of the corresponding wavenumber and the number of data points of the beam segment. The marginal distributions for each wavenumber are shown in gray. d) The weighted mean across the pairs with the most likely incident angle as thick blue line and the WW3 priors for all used wave numbers as orange lines.

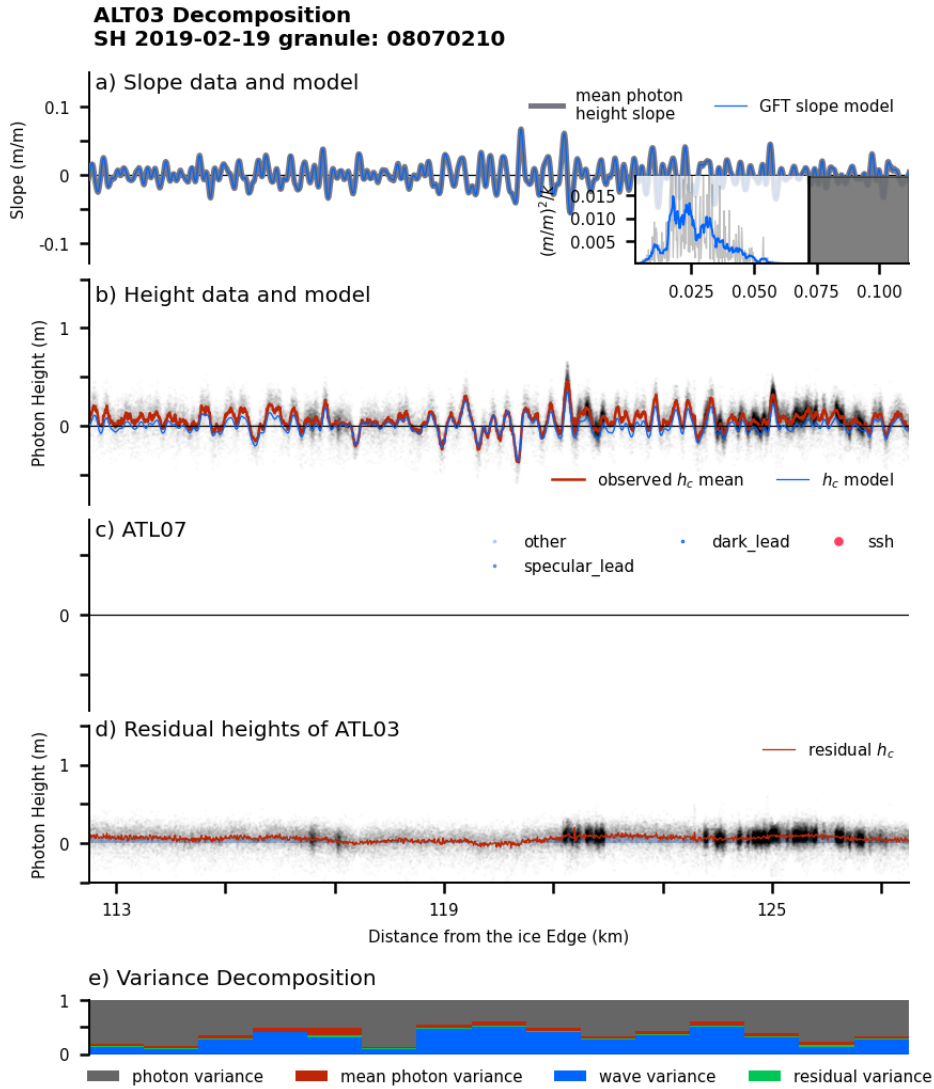

Figure S9: Same as main-text figure 10 but for another segment on Track 2. In this case no ATL07 data is not provided.

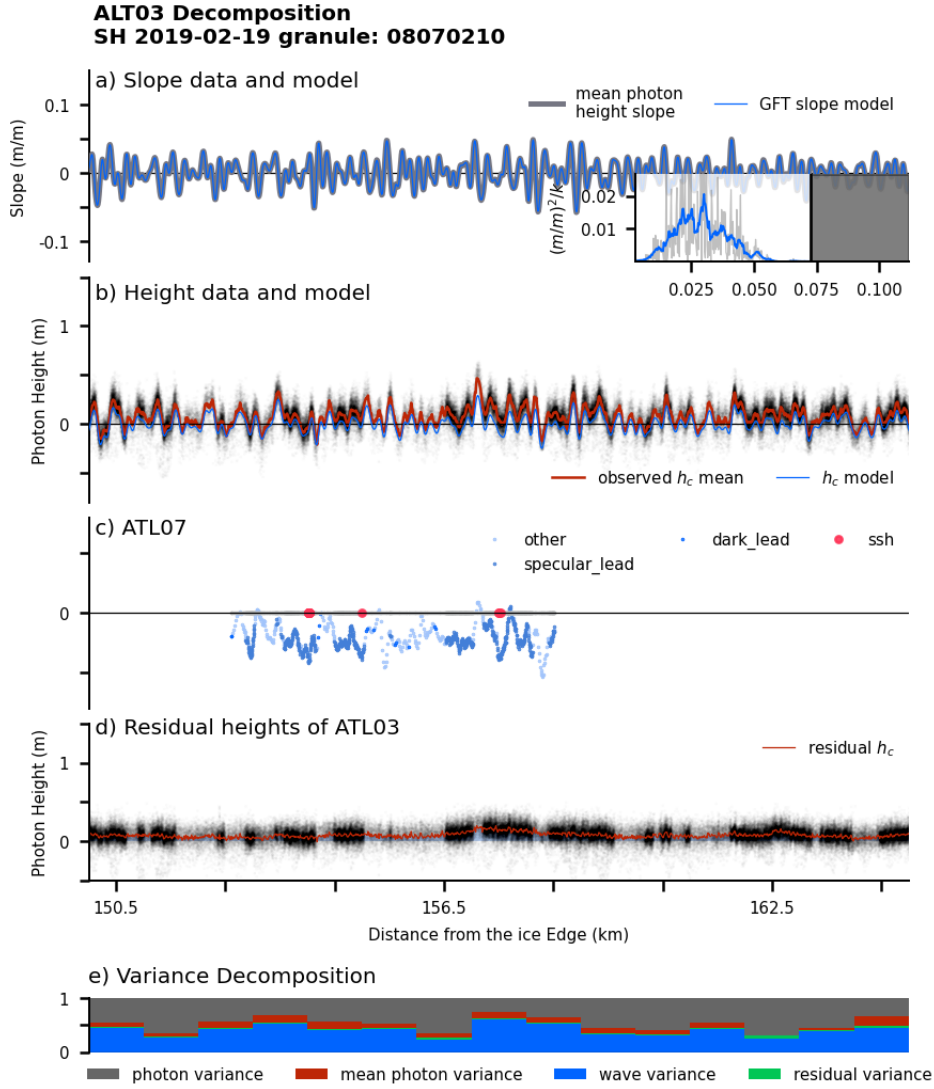

Figure S10: Same as main-text figure 10 but for another segment on Track 2. In this case most of the ATL07 data is not provided.

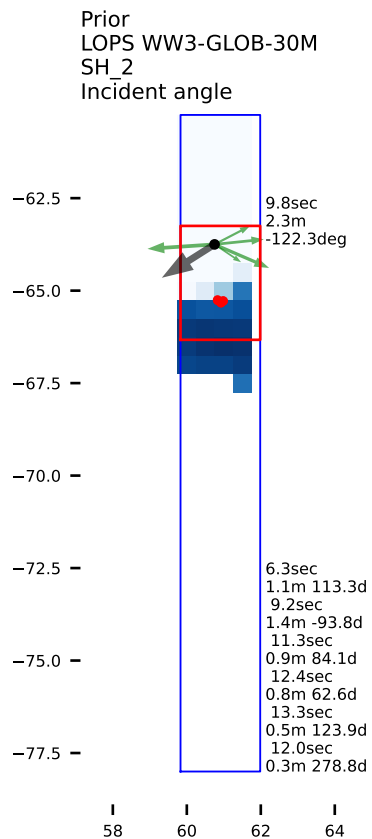

Figure S11: Derivation of the angle prior  $\mathbf{P}_\theta$  based on WW3 partition (green arrows). The red box is the region north of the sea ice (blue shading) with at least 66% open water around the ATL03 most-equatorward data point (red dots). The box mean of the partitions peak wave direction, period and significant wave height ( $H_s$ ) as provided by WW3 are shown as green arrows. The total peak wave direction, period and  $H_s$  across all frequencies is shown as black arrow. The green arrows correspond to the black dots in main-text figure 7.

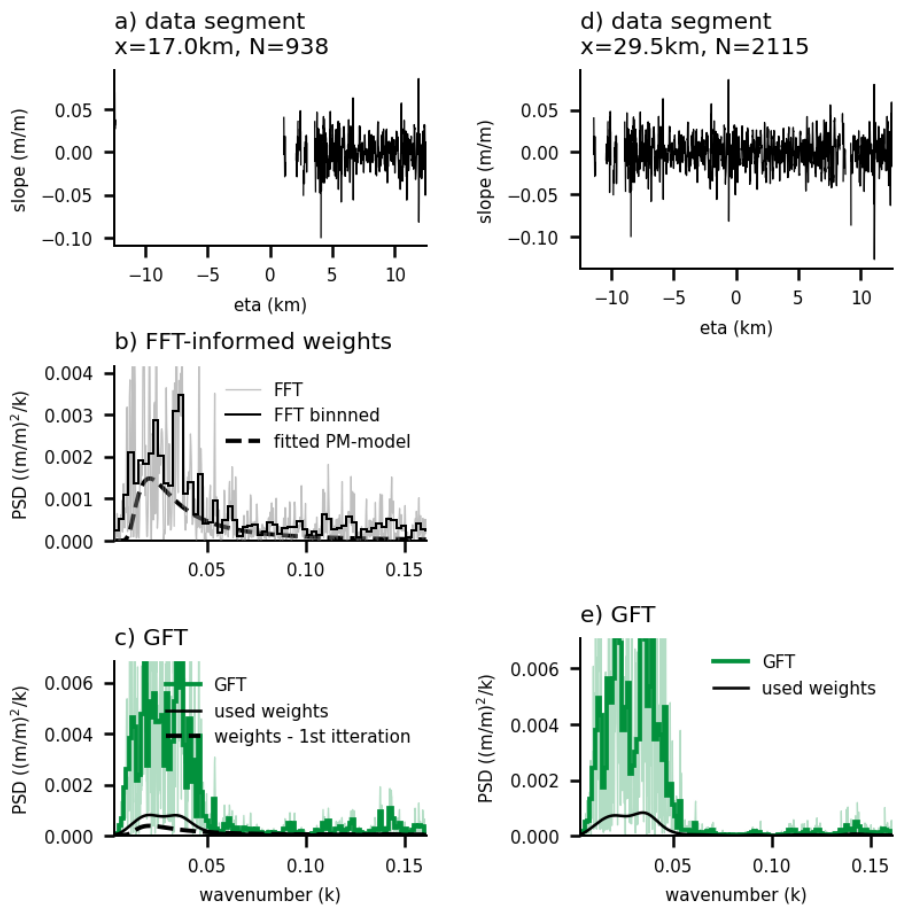

Figure S12: Same as in Appendix figure A1m but for example Track 2.
